# Supplementary material for: Genome-Wide DNA Methylation and Gene Expression in Patients with Indolent Systemic Mastocytosis
Source: MDPI journal article supplement (doi:10.3390/ijms241813910), 2023-09-10
Supplement: s1 [file s1]

## Supplementary materials

Table S1. Summary table of 85 CMRs.

| deltaBeta | P.Value    | CMR   | gene     | feature | cgi     | chr   | start     | end       | no.cpgs |
|-----------|------------|-------|----------|---------|---------|-------|-----------|-----------|---------|
| 0.3328    | 7.8249E-08 | CMR1  | HOOK2    | Body    | shore   | chr19 | 12876846  | 12877188  | 4       |
| 0.2376    | 2.2321E-17 | CMR2  |          | IGR     | opensea | chr1  | 225924665 | 225924683 | 2       |
| 0.1515    | 5.5525E-12 | CMR3  |          | IGR     | shore   | chr3  | 16924563  | 16924709  | 2       |
| 0.1456    | 1.4603E-09 | CMR4  |          | IGR     | opensea | chr2  | 29179066  | 29179435  | 2       |
| -0.1378   | 6.1083E-08 | CMR5  |          | IGR     | island  | chr22 | 49447845  | 49448320  | 3       |
| 0.1222    | 1.2099E-17 | CMR6  | INTS7    | Body    | opensea | chr1  | 212148758 | 212149423 | 2       |
| 0.1217    | 2.5599E-10 | CMR7  | SH3PXD2A | TSS1500 | shore   | chr10 | 105616094 | 105616523 | 2       |
| 0.1087    | 2.5023E-12 | CMR8  | TMPRSS6  | Body    | island  | chr22 | 37493737  | 37494173  | 2       |
| 0.1047    | 1.4676E-11 | CMR9  | SGMS1    | 5'UTR   | opensea | chr10 | 52134715  | 52135449  | 2       |
| -0.1008   | 1.4746E-10 | CMR10 | APOB     | TSS1500 | shore   | chr2  | 21267858  | 21268152  | 2       |
| -0.0997   | 2.3214E-08 | CMR11 | RASGEF1B | 5'UTR   | shore   | chr4  | 82392459  | 82392533  | 2       |
| 0.0986    | 4.7402E-11 | CMR12 |          | IGR     | island  | chr3  | 155027702 | 155027875 | 2       |
| 0.0957    | 3.0711E-09 | CMR13 | CDH7     | TSS1500 | shore   | chr18 | 63416728  | 63417139  | 3       |
| 0.0938    | 4.1209E-08 | CMR14 |          | IGR     | opensea | chr16 | 85455848  | 85456440  | 3       |
| 0.0895    | 1.9509E-14 | CMR15 |          | IGR     | opensea | chr7  | 54794719  | 54794760  | 2       |
| 0.0880    | 3.5338E-11 | CMR16 | ADGRG6   | TSS1500 | shore   | chr6  | 142621875 | 142622515 | 4       |
| -0.0863   | 3.3584E-08 | CMR17 | LOC84931 | Body    | opensea | chr2  | 121223534 | 121223847 | 3       |
| -0.0858   | 1.5291E-08 | CMR18 | KRTCAP3  | TSS1500 | shore   | chr2  | 27664918  | 27666036  | 11      |
| 0.0798    | 8.5844E-09 | CMR19 | PAQR7    | TSS1500 | shelf   | chr1  | 26198721  | 26199190  | 2       |
| 0.0791    | 2.9502E-08 | CMR20 | CCDC42   | Body    | opensea | chr17 | 8644134   | 8645026   | 2       |
| 0.0777    | 2.5646E-09 | CMR21 | FAM189A1 | Body    | opensea | chr15 | 29442040  | 29442169  | 2       |
| 0.0775    | 2.0624E-08 | CMR22 | SLC8A1   | Body    | opensea | chr2  | 40599929  | 40599951  | 2       |

|         |            |       |              |         |         |       |           |           |   |
|---------|------------|-------|--------------|---------|---------|-------|-----------|-----------|---|
| -0.0769 | 8.0441E-12 | CMR23 | FUBP1        | 1stExon | island  | chr1  | 78444801  | 78444909  | 4 |
| 0.0766  | 6.4584E-08 | CMR24 |              | IGR     | shore   | chr4  | 56023423  | 56024434  | 5 |
| -0.0752 | 1.1735E-09 | CMR25 | C21orf91-OT1 | Body    | opensea | chr21 | 19157142  | 19157630  | 2 |
| -0.0737 | 5.2954E-10 | CMR26 | FAM123C      | TSS1500 | shore   | chr2  | 131512651 | 131512663 | 2 |
| 0.0729  | 1.3801E-08 | CMR27 | LOC100507195 | TSS1500 | opensea | chr12 | 68845785  | 68845935  | 2 |
| 0.0724  | 3.9684E-14 | CMR28 | LOC102724312 | Body    | shelf   | chr1  | 1368387   | 1368846   | 3 |
| 0.0722  | 2.9806E-12 | CMR29 |              | IGR     | shore   | chr5  | 54515036  | 54515053  | 2 |
| 0.0719  | 2.9210E-09 | CMR30 | TCTEX1D1     | Body    | opensea | chr1  | 67241623  | 67241759  | 2 |
| 0.0713  | 4.7500E-09 | CMR31 | TMEM220      | TSS1500 | shore   | chr17 | 10634349  | 10634532  | 3 |
| -0.0690 | 5.3363E-08 | CMR32 | ANKMY1       | 5'UTR   | island  | chr2  | 241496830 | 241497599 | 8 |
| -0.0685 | 4.5255E-09 | CMR33 | C9orf171     | Body    | island  | chr9  | 135361993 | 135362480 | 3 |
| -0.0680 | 1.8571E-09 | CMR34 | AFAP1        | Body    | island  | chr4  | 7774727   | 7774768   | 2 |
| 0.0678  | 1.6169E-09 | CMR35 | COX19        | Body    | shelf   | chr7  | 1012599   | 1012935   | 2 |
| 0.0677  | 6.9650E-09 | CMR36 | TMEM246-AS1  | TSS1500 | opensea | chr9  | 104230769 | 104231650 | 3 |
| -0.0676 | 1.7234E-08 | CMR37 | GRM2         | TSS1500 | shore   | chr3  | 51740622  | 51741473  | 9 |
| 0.0662  | 1.4129E-08 | CMR38 | RUNX3        | Body    | opensea | chr1  | 25240865  | 25240938  | 3 |
| -0.0661 | 2.8580E-08 | CMR39 |              | IGR     | island  | chr19 | 384251    | 384408    | 3 |
| 0.0649  | 4.6826E-08 | CMR40 | TG           | Body    | opensea | chr8  | 134104425 | 134104479 | 2 |
| -0.0644 | 1.7753E-10 | CMR41 | MFSD11       | 5'UTR   | island  | chr17 | 74733680  | 74733682  | 2 |
| -0.0641 | 3.4287E-09 | CMR42 | SLC2A14      | 5'UTR   | island  | chr12 | 8025394   | 8025593   | 3 |
| 0.0638  | 4.3861E-09 | CMR43 | CDH4         | Body    | opensea | chr20 | 59878174  | 59878179  | 2 |
| 0.0637  | 4.0188E-16 | CMR44 | NEK6         | 3'UTR   | opensea | chr9  | 127114252 | 127114588 | 2 |
| -0.0637 | 8.5138E-09 | CMR45 | PLSCR2       | TSS200  | island  | chr3  | 146187109 | 146187740 | 6 |
| -0.0633 | 1.5764E-08 | CMR46 | PLEC1        | Body    | island  | chr8  | 145003653 | 145005311 | 6 |
| -0.0627 | 8.0848E-08 | CMR47 | PCDHGA4      | Body    | island  | chr5  | 140821425 | 140821687 | 2 |
| -0.0621 | 1.4659E-09 | CMR48 | CCER2        | TSS200  | opensea | chr19 | 39402823  | 39403047  | 6 |

|         |            |       |          |         |         |       |           |           |   |
|---------|------------|-------|----------|---------|---------|-------|-----------|-----------|---|
| 0.0615  | 7.1388E-09 | CMR49 |          | IGR     | shore   | chr10 | 101282572 | 101283847 | 8 |
| -0.0615 | 7.3134E-08 | CMR50 | GPR176   | Body    | shore   | chr15 | 40211258  | 40211272  | 2 |
| -0.0612 | 1.1385E-08 | CMR51 |          | IGR     | opensea | chr14 | 61654132  | 61655862  | 4 |
| 0.0610  | 1.0215E-10 | CMR52 | PHKB     | Body    | opensea | chr16 | 47677874  | 47678468  | 2 |
| -0.0603 | 2.5866E-09 | CMR53 | RAB22A   | TSS1500 | shore   | chr20 | 56883532  | 56884425  | 4 |
| 0.0590  | 1.2735E-08 | CMR54 | SCG2     | TSS200  | opensea | chr2  | 224467340 | 224467359 | 2 |
| -0.0584 | 7.9888E-08 | CMR55 |          | IGR     | shelf   | chr4  | 41872254  | 41872262  | 2 |
| 0.0584  | 1.7914E-09 | CMR56 | SH3GL2   | Body    | opensea | chr9  | 17601130  | 17601150  | 2 |
| -0.0581 | 6.8818E-08 | CMR57 | RPS6KA2  | Body    | opensea | chr6  | 167004045 | 167004197 | 2 |
| -0.0575 | 3.8766E-08 | CMR58 |          | IGR     | opensea | chr10 | 133892406 | 133892567 | 3 |
| 0.0573  | 1.9250E-09 | CMR59 |          | IGR     | opensea | chr7  | 129649151 | 129649196 | 2 |
| -0.0571 | 7.3131E-09 | CMR60 | SLC6A16  | TSS200  | island  | chr19 | 49828658  | 49828667  | 2 |
| -0.0568 | 5.2999E-08 | CMR61 | SYCP2L   | TSS1500 | shore   | chr6  | 10886573  | 10886967  | 2 |
| 0.0562  | 1.3401E-08 | CMR62 | IQCE     | Body    | shore   | chr7  | 2646782   | 2647414   | 5 |
| 0.0557  | 4.6995E-08 | CMR63 | CCDC102B | 5'UTR   | opensea | chr18 | 66389420  | 66389447  | 2 |
| 0.0555  | 3.3118E-08 | CMR64 | CMC1     | TSS1500 | shore   | chr3  | 28281945  | 28282245  | 2 |
| 0.0554  | 1.4900E-08 | CMR65 |          | IGR     | shelf   | chr6  | 169564460 | 169565259 | 2 |
| -0.0554 | 4.7473E-08 | CMR66 | LOC84931 | TSS200  | opensea | chr2  | 121223947 | 121224009 | 3 |
| 0.0551  | 7.3695E-12 | CMR67 | GPR124   | Body    | opensea | chr8  | 37672607  | 37672725  | 2 |
| -0.0550 | 3.5858E-08 | CMR68 | NKAIN3   | TSS1500 | island  | chr8  | 63161077  | 63161676  | 6 |
| -0.0548 | 2.8443E-10 | CMR69 | CPEB1    | Body    | island  | chr15 | 83315922  | 83316223  | 2 |
| 0.0530  | 2.1109E-09 | CMR70 | RASA3    | Body    | opensea | chr13 | 114829170 | 114829496 | 2 |
| 0.0524  | 3.0390E-09 | CMR71 | TRIM31   | Body    | opensea | chr6  | 30079524  | 30079536  | 2 |
| -0.0522 | 2.2167E-08 | CMR72 | NDUFS7   | Body    | island  | chr19 | 1387894   | 1387991   | 2 |
| -0.0520 | 3.3662E-10 | CMR73 | ANO1     | TSS200  | island  | chr11 | 69924390  | 69924724  | 2 |
| -0.0518 | 4.8156E-11 | CMR74 | SLC6A3   | Body    | opensea | chr5  | 1412236   | 1413138   | 2 |
| -0.0516 | 1.7391E-08 | CMR75 | LRRC52   | 1stExon | opensea | chr1  | 165513699 | 165513716 | 2 |

|         |            |       |         |         |         |       |           |           |    |
|---------|------------|-------|---------|---------|---------|-------|-----------|-----------|----|
| 0.0515  | 2.0062E-11 | CMR76 | RINT1   | Body    | opensea | chr7  | 105182555 | 105182968 | 2  |
| 0.0515  | 5.2722E-09 | CMR77 | EDARADD | TSS1500 | shore   | chr1  | 236557670 | 236558142 | 3  |
| 0.0515  | 2.7443E-09 | CMR78 | LPCAT1  | Body    | opensea | chr5  | 1518133   | 1518179   | 2  |
| -0.0513 | 2.9004E-13 | CMR79 | SGPP2   | TSS200  | island  | chr2  | 223289277 | 223289560 | 3  |
| 0.0512  | 2.3879E-12 | CMR80 |         | IGR     | opensea | chr16 | 85006502  | 85007113  | 2  |
| -0.0510 | 6.3981E-12 | CMR81 | YWHAE   | TSS1500 | island  | chr17 | 1303810   | 1303864   | 2  |
| 0.0510  | 2.3476E-09 | CMR82 | EAPP    | TSS1500 | shore   | chr14 | 35009492  | 35009523  | 3  |
| 0.0506  | 1.8497E-09 | CMR83 | TMEM246 | TSS1500 | shore   | chr9  | 104249643 | 104249936 | 6  |
| -0.0506 | 4.5724E-09 | CMR84 | FUT11   | Body    | shore   | chr10 | 75533350  | 75533431  | 3  |
| -0.0501 | 2.1273E-09 | CMR85 | PCDHGA4 | Body    | shore   | chr5  | 140762229 | 140764485 | 11 |

Table S2. Results of mRNA expression of the selected genes

| Gene           | fold change MEAN |            | p value |
|----------------|------------------|------------|---------|
|                | MAST             | CONT       |         |
| <b>ABCA2</b>   | 1,05059702       | 1,09472707 | 0,491   |
| <b>SLC2A14</b> | 1,00959309       | 1,63626564 | 0,185   |
| <b>CDH7</b>    | -                | -          | -       |
| <b>TET2</b>    | 2,58627005       | 2,3795486  | 0,403   |
| <b>DNTM3A</b>  | 0,93547386       | 1,67946959 | 0,658   |
| <b>TPSB2</b>   | 1,7867782        | 1,16602146 | 0,804   |
| <b>EAPP</b>    | 1,17225194       | 1,07140954 | 0,752   |
| <b>EDARADD</b> | 0,99148009       | 1,09568898 | 0,528   |
| <b>GRM2</b>    | 2,42735293       | 1,29805674 | 0,013   |
| <b>HDAC9</b>   | 1,38911158       | 1,27632233 | 0,899   |
| <b>KRTCAP3</b> | 1,82219047       | 1,34761903 | 0,036   |
| <b>OTX2</b>    | -                | -          | -       |
| <b>RAB22A</b>  | 1,51356827       | 1,02778243 | 0,483   |
| <b>RASGEF1</b> | 1,31683775       | 1,04720982 | 0,967   |
| <b>RUNX1</b>   | 1,06108958       | 1,02786376 | 0,372   |

|                |            |            |       |
|----------------|------------|------------|-------|
| <b>SCG2</b>    | -          | -          | -     |
| <b>SETD2</b>   | 1,37415588 | 1,0786928  | 0,119 |
| <b>SGMS1</b>   | 1,03709648 | 1,03287142 | 0,76  |
| <b>SH3PXD2</b> | 1,86620573 | 1,12833791 | 0,128 |

Table S3 a-c.

Tabela 3. The cell decomposition in the studied groups using three different methods: the Houseman method implemented in RefBaseEWAS, Table 3a; Robust Partial Correlations, Table 3b, and Cibersort (CBS), Table 3c.

Table S3a. The cell decomposition in the studied groups using three different methods: the Houseman method implemented in RefBaseEWAS

| STUDY GROUP | CD8T       | CD4T      | NK         | Bcell      | Mono       | Gran      |
|-------------|------------|-----------|------------|------------|------------|-----------|
| CONT        | 0.07267264 | 0.1483493 | 0.06610037 | 0.03250597 | 0.07992596 | 0.5953870 |
| MAST        | 0.05156082 | 0.1520580 | 0.03502721 | 0.03468947 | 0.06289315 | 0.6589662 |

Table S3b. The cell decomposition in the studied groups using Robust Partial Correlations

| STUDY GROUP | CD8T       | CD4T      | NK         | Bcell      | Mono       | Gran      |
|-------------|------------|-----------|------------|------------|------------|-----------|
| CONT        | 0.07936191 | 0.1430781 | 0.07361965 | 0.04276324 | 0.07928041 | 0.5818967 |
| MAST        | 0.06117826 | 0.1461951 | 0.04349404 | 0.04523343 | 0.06259314 | 0.6413061 |

Table S3c. The cell decomposition in the studied groups using Cibersort (CBS)

| STUDY GROUP | CD8T       | CD4T      | NK         | Bcell      | Mono       | Gran      |
|-------------|------------|-----------|------------|------------|------------|-----------|
| CONT        | 0.07190795 | 0.1404726 | 0.06873357 | 0.04180945 | 0.08023738 | 0.5968391 |
| MAST        | 0.05516744 | 0.1410714 | 0.03917300 | 0.04545167 | 0.06390287 | 0.6552336 |
